# Supplementary material
Source: PubMed Central journal article supplement (PMC9718020)
Supplement: CJN.07100622-s0001.pdf [file CJN.07100622-s0001.pdf]

## **Supplemental Material**

Supplemental Table 1: MEDLINE Search Strategy

Supplemental Table 2: Menstrual Disturbances in Dialyzed Females Living with CKD

Supplemental Table 3: Menstrual Disturbances in Transplanted Females Living with CKD

Supplemental Table 4: Study Quality Assessment.

Supplemental Figure 1. Prevalence of menstrual disturbances in dialyzed females.

Supplemental Figure 2. Pooled age of menarche, stratified by kidney replacement therapy type, in females with chronic kidney disease.

Supplemental Figure 3. Pooled age of menopause, stratified by kidney replacement therapy type, in females with chronic kidney disease.

Supplemental Figure 4. Pooled reproductive lifespan in females with chronic kidney disease.

Supplemental Figure 5. Funnel plot for assessment of publication bias of pooled risk difference of menstrual disturbance in females with chronic kidney disease pre- and post- kidney transplantation.

Supplemental Table 1: MEDLINE Search Strategy

|    |                                                                                                                                                                                                                                                                                                                                                                    |        |
|----|--------------------------------------------------------------------------------------------------------------------------------------------------------------------------------------------------------------------------------------------------------------------------------------------------------------------------------------------------------------------|--------|
| 1  | (chronic kidney disease* or chronic renal disease* or nephropath*).tw,kf.                                                                                                                                                                                                                                                                                          | 118006 |
| 2  | ((renal or kidney) adj (insufficien* or failure or diseas* or impair*)).tw,kf. or exp Renal Insufficiency/ or exp Renal Insufficiency, Chronic/                                                                                                                                                                                                                    | 327849 |
| 3  | (end adj stage adj (renal or kidney) adj diseas*).tw,kf. or exp Kidney Diseases/                                                                                                                                                                                                                                                                                   | 541799 |
| 4  | (kidney fail* or renal fail* or KF).tw,kf. or exp Kidney Failure, Chronic/                                                                                                                                                                                                                                                                                         | 172686 |
| 5  | (kidney transplant* or renal transplant* or kidney allograft* or renal allograft*).tw,kf. or Kidney Transplantation/                                                                                                                                                                                                                                               | 117335 |
| 6  | ((proteinuria or urin*) adj2 (albumin or protein) adj2 excret*).tw,kf. or exp Proteinuria/                                                                                                                                                                                                                                                                         | 43458  |
| 7  | albuminuria.tw,kf. or exp Albuminuria/                                                                                                                                                                                                                                                                                                                             | 21464  |
| 8  | (glomerular adj filtration adj rate).tw,kf. or exp Glomerular Filtration Rate/ [mp=title, abstract, original title, name of substance word, subject heading word, floating sub-heading word, keyword heading word, organism supplementary concept word, protocol supplementary concept word, rare disease supplementary concept word, unique identifier, synonyms] | 68116  |
| 9  | (CKD or CRF or CRI or ESRD or ESKD).tw,kf.                                                                                                                                                                                                                                                                                                                         | 69407  |
| 10 | (?GFR or estimated GFR).tw,kf.                                                                                                                                                                                                                                                                                                                                     | 20451  |
| 11 | (pre?dialysis or ?dialysis or renal replacement therapy or kidney replacement therapy or RRT or KRT).tw,kf. or exp Renal Replacement Therapy/ or exp Peritoneal Dialysis/ or exp Dialysis/ or exp Renal Dialysis/                                                                                                                                                  | 288002 |
| 12 | exp Hemofiltration/                                                                                                                                                                                                                                                                                                                                                | 6911   |
| 13 | (h?emo?dialysis or h?emo?filtration).tw,kf.                                                                                                                                                                                                                                                                                                                        | 83876  |
| 14 | (MAU or micro?albuminuria or macro?albuminuria).tw,kf.                                                                                                                                                                                                                                                                                                             | 10524  |
| 15 | ((((albumin or protein) adj creatinine adj ratio) or albumin?creatinine* or protein?creatinine*).tw,kf.                                                                                                                                                                                                                                                            | 3795   |
| 16 | exp Menarche/                                                                                                                                                                                                                                                                                                                                                      | 5132   |
| 17 | exp Menstruation/ or exp Menstrual Cycle/ or exp Menstruation Disturbances/                                                                                                                                                                                                                                                                                        | 58148  |
| 18 | exp Menopause/                                                                                                                                                                                                                                                                                                                                                     | 58981  |
| 19 | (?menopaus* or menstrua* or mense* or menarche).tw,kf.                                                                                                                                                                                                                                                                                                             | 108039 |
| 20 | exp Reproductive Medicine/ or exp Reproductive Health/                                                                                                                                                                                                                                                                                                             | 26814  |
| 21 | exp Fertility/                                                                                                                                                                                                                                                                                                                                                     | 42632  |
| 22 | (reproduc* life* or reproduc* span* or reproduc* period).tw,kf.                                                                                                                                                                                                                                                                                                    | 3898   |
| 23 | (premature ovarian failure* or primary ovarian failure*).tw,kf. or exp Primary Ovarian Insufficiency/                                                                                                                                                                                                                                                              | 4216   |
| 24 | exp Ovarian Follicle/                                                                                                                                                                                                                                                                                                                                              | 28722  |
| 25 | amenorrh*.tw,kf. or exp Amenorrhea/                                                                                                                                                                                                                                                                                                                                | 16859  |

|    |                                                                                                    |         |
|----|----------------------------------------------------------------------------------------------------|---------|
| 26 | hyperprolactinemi*.tw,kf. or exp Hyperprolactinemia/                                               | 6643    |
| 27 | oligomenorrhe*.tw,kf. or exp Oligomenorrhea/                                                       | 1571    |
| 28 | dysmenorrhe.tw,kf. or exp Dysmenorrhea/                                                            | 4148    |
| 29 | metrorrhagi*.tw,kf. or exp Metrorrhagia/                                                           | 3243    |
| 30 | menorrhagi*.tw,kf. or exp Menorrhagia/                                                             | 6111    |
| 31 | (menopaus* adj prematur*).tw,kf. or exp Menopause, Premature/                                      | 1095    |
| 32 | (premature ovarian insuffic* or primary ovarian insuffic*).tw,kf.                                  | 1495    |
| 33 | 1 or 2 or 3 or 4 or 5 or 6 or 7 or 8 or 9 or 10 or 11 or 12 or 13 or 14 or 15                      | 874287  |
| 34 | 16 or 17 or 18 or 19 or 20 or 21 or 22 or 23 or 24 or 25 or 26 or 27 or 28 or 29 or 30 or 31 or 32 | 274412  |
| 35 | 33 and 34                                                                                          | 2629    |
| 36 | animals/ not humans/                                                                               | 4818559 |
| 37 | 35 not 36                                                                                          | 2462    |
| 38 | limit 37 to (case reports or comment or editorial or letter or "review" or "systematic review")    | 811     |
| 39 | 37 not 38                                                                                          | 1651    |

Supplemental Table 2: Menstrual Disturbances in Dialyzed Females Living with CKD

| Author (year)         | MD pre-CRF (n) | MD pre-dialysis (n) | MD at study investigation (n) | KRT | Type of Disturbance            | Definition                                                                  | n (%)*   |
|-----------------------|----------------|---------------------|-------------------------------|-----|--------------------------------|-----------------------------------------------------------------------------|----------|
| <b>Ølgaard (1975)</b> | NR             | NR                  | 8                             | HD  | Irregular Menses               | N/A                                                                         | 2 (33%)  |
|                       |                |                     |                               |     | PD                             | Irregular Menses                                                            | N/A      |
| <b>Morley (1979)</b>  | 1              | 10                  | 12                            | HD  | Polymenorrhea                  | N/A                                                                         | 5 (42%)  |
|                       |                |                     |                               |     | Oligomenorrhea & Menorrhagia   | N/A                                                                         | 2 (17%)  |
|                       |                |                     |                               |     | Regular & Menorrhagia          | N/A                                                                         | 1 (8%)   |
|                       |                |                     |                               |     | Amenorrhea                     | N/A                                                                         | 4 (33%)  |
| <b>Gómez (1980)</b>   | NR             | NR                  | 11                            | HD  | Oligomenorrhea                 | Menstruation interval of >35 days                                           | 4 (36%)  |
|                       |                |                     |                               |     | Dysfunctional Uterine Bleeding | N/A                                                                         | 1 (9%)   |
|                       |                |                     |                               |     | Amenorrhea                     | N/A                                                                         | 6 (55%)  |
| <b>Lim (1980)</b>     | NR             | NR                  | 16                            | HD  | Irregular Menses               | Ranging from occasional spotting to frequent dysfunctional uterine bleeding | 6 (35%)  |
|                       |                |                     |                               |     | Amenorrhea                     | N/A                                                                         | 10 (59%) |
| <b>Weizman (1983)</b> | NR             | NR                  | 9                             | HD  | 'No Menses'                    | N/A                                                                         | 9 (47%)  |
| <b>Otieno (1993)</b>  | NR             | 18                  | 16                            | HD  | Oligomenorrhea                 | N/A                                                                         | 0 (0%)   |
|                       |                |                     |                               |     | Amenorrhea                     | N/A                                                                         | 11 (85%) |

|                               |    |    |    |       |              |                              |                                                             |          |
|-------------------------------|----|----|----|-------|--------------|------------------------------|-------------------------------------------------------------|----------|
|                               |    |    |    |       | PD           | Oligomenorrhea               | N/A                                                         | 0 (0%)   |
|                               |    |    |    |       |              | Amenorrhea                   | N/A                                                         | 1 (100%) |
|                               |    |    |    |       | Conservative | Oligomenorrhea               | N/A                                                         | 2 (8%)   |
|                               |    |    |    |       |              | Amenorrhea                   | N/A                                                         | 2 (8%)   |
| <b>Kawashima (1998)</b>       | NR | 0  | 12 | HD    |              | Normogonadotropic Amenorrhea | Menstruation interval of >6 months                          | 3 (12%)  |
|                               |    |    |    |       |              | Hypergonadotropic Amenorrhea | Menstruation interval of >6 months and serum FSH >40 mIU/mL | 3 (12%)  |
|                               |    |    |    |       |              | Oligomenorrhea               | Menstrual-like bleeding episodes of bleeding >35 days apart | 6 (24%)  |
| <b>Weisinger (2000)</b>       | NR | NR | 31 | HD    |              | Amenorrhea                   | Absence of menstrual bleeding for >6 months                 | 31 (42%) |
| <b>Jang (2001)</b>            | NR | NR | 5  | HD    |              | Irregular Menses             | N/A                                                         | 5 (33%)  |
| <b>Shanmugavadivoo (2003)</b> | NR | NR | 6  | HD/PD |              | Irregular Menses             | N/A                                                         | 6 (17%)  |
| <b>Di Iorio (2004)</b>        | NR | NR | 78 | HD    |              | Amenorrhea                   | No menstrual bleeding in the last 3 months                  | 78 (59%) |

|                                      |                                 |          |    |    |                  |                                             |                |
|--------------------------------------|---------------------------------|----------|----|----|------------------|---------------------------------------------|----------------|
| <b>Matuszkiewicz-Rowińska (2004)</b> | NR                              | NR       | 55 | HD | Amenorrhea       | Absence of menstrual bleeding for >6 months | 25 (33%)       |
|                                      |                                 |          |    |    | Polymenorrhea    | Cycle <28 days                              | 13 (17%)       |
|                                      |                                 |          |    |    | Oligomenorrhea   | Cycle >32 days                              | 17 (23%)       |
| <b>Arikan (2011)</b>                 | NR                              | NR       | 13 | HD | Amenorrhea       | N/A                                         | 5 (17%)        |
|                                      |                                 |          |    |    | Oligomenorrhea   | N/A                                         | 7 (23%)        |
|                                      |                                 |          |    |    | Menomentrorragia | N/A                                         | 1 (3%)         |
| <b>Al-Turki (2014)</b>               | NR                              | NR       | 11 | HD | Irregular Menses | N/A                                         | 11 (61%)       |
| <b>Lin (2016)</b>                    | NR                              | NR       | 88 | HD | Polymenorrhea    | Cycle <22 days                              | 8 (17%)        |
|                                      |                                 |          |    |    | Oligomenorrhea   | Cycle >35 days                              | 6 (13%)        |
|                                      |                                 |          |    |    | Amenorrhea       | Absence of menses for > 6months             | 21 (46%)       |
|                                      |                                 |          |    |    | Polymenorrhea    | Cycle <22 days                              | 8 (19%)        |
|                                      |                                 |          |    | PD | Oligomenorrhea   | Cycle >35 days                              | 5 (12%)        |
|                                      |                                 |          |    |    | Amenorrhea       | Absence of menses for > 6months             | 18 (42%)       |
|                                      |                                 |          |    |    | Polymenorrhea    | Cycle <22 days                              | 6 (15%)        |
|                                      |                                 |          |    |    | NHD              | Oligomenorrhea                              | Cycle >35 days |
| Amenorrhea                           | Absence of menses for > 6months | 12 (30%) |    |    |                  |                                             |                |
| <b>Sikora-Grabka (2016)</b>          | NR                              | NR       | 25 | HD | Irregular Menses | Cycles < or > 29 ± 3 days                   | 19 (41%)       |
|                                      |                                 |          |    |    | Amenorrhea       | Lack of menstrual cycle >6 months           | 6 (13%)        |

|                              |    |    |    |    |                       |     |          |
|------------------------------|----|----|----|----|-----------------------|-----|----------|
| <b>Teuwafeu (2016)</b>       | NR | NR | 26 | HD | Irregular Menses      | N/A | 14 (45%) |
|                              |    |    |    |    | Non-Gravid Amenorrhea | N/A | 12 (39%) |
|                              |    |    |    |    | Polymenorrhea         | N/A | 8 (26%)  |
|                              |    |    |    |    | Oligomenorrhea        | N/A | 8 (26%)  |
|                              |    |    |    |    | Menomentrorragia      | N/A | 3 (10%)  |
| <b>Serret-Montoya (2020)</b> | 0  | 5  | 25 | HD | Menstrual Disorder    | N/A | 15 (60%) |
|                              |    |    |    | PD | Menstrual Disorder    | N/A | 10 (53%) |

**Notes:** KRT: kidney replacement therapy; HD: hemodialysis; PD: peritoneal dialysis; FSH: follicle-stimulating hormone; NR: not reported; NHD: nocturnal hemodialysis. % of pre-menopausal sample size within dialysis modality. <sup>a</sup>not included in meta-analyses.

Supplemental Table 3: Menstrual Disturbances in Transplanted Females Living with CKD

| Author (year)           | KRT                    | Type of Disturbance                                                                    | Definition                       | Pre-Transplantation Disturbances, n (%) | Post-Transplantation Disturbances, n (%) |
|-------------------------|------------------------|----------------------------------------------------------------------------------------|----------------------------------|-----------------------------------------|------------------------------------------|
| <b>Bierman (1977)</b>   | <b>Transplantation</b> | Amenorrhea                                                                             | NR                               | 12 (52%)                                | 0 (0%)                                   |
|                         |                        | Irregular Menses                                                                       | NR                               | 9 (39%)                                 | 8 (38%)                                  |
| <b>Morley (1979)</b>    |                        | Amenorrhea                                                                             | NR                               | 1 (20%)                                 | 1 (20%)                                  |
|                         |                        | Menorrhagia                                                                            | NR                               | 2 (40%)                                 | 0 (0%)                                   |
|                         |                        | Oligomenorrhea                                                                         | NR                               | 0 (0%)                                  | 1 (20%)                                  |
| <b>El-Sheikh (1987)</b> |                        | Amenorrhea                                                                             | No period for more than 6 months | 32 (67%)                                | 0 (0%)                                   |
| <b>Schover (1990)</b>   |                        | Irregular Menses                                                                       | NR                               | 2 (10%)                                 | 5 (20%)                                  |
|                         |                        | No Menses                                                                              | NR                               | 10 (48%)                                | 4 (16%)                                  |
| <b>Kim (1998)</b>       |                        | Irregular Menses                                                                       | NR                               | 24 (34%)                                | 24 (35%)                                 |
|                         |                        | No Menses                                                                              | NR                               | 30 (42%)                                | 11 (16%)                                 |
| <b>Guazzelli (2008)</b> | Irregular Menses       | Excessive menses (bleeding >5 days), short cycles (<20 days) or long cycles (>45 days) | 139 (71%)                        | 99 (50%)                                |                                          |
| <b>Filocamo (2009)</b>  | Amenorrhea             | No cycle for $\geq 6$ months                                                           | 15 (38%)                         | 6 (15%)                                 |                                          |
|                         | Oligomenorrhea         | Cycle lasting >32 days                                                                 | 12 (31%)                         | 9 (23%)                                 |                                          |



|                               |                        |                                                                                   |          |          |
|-------------------------------|------------------------|-----------------------------------------------------------------------------------|----------|----------|
|                               | Polymenorrhea          | Cycle lasting <28 days                                                            | 2 (5%)   | 3 (8%)   |
| <b>Kramer (Sept. 2003)</b>    | Amenorrhea             | ≥6 months before transplantation                                                  | 7 (18%)  | 0 (0%)   |
|                               | Irregular and Sporadic | NR                                                                                | 14 (37%) | 12 (29%) |
| <b>Karayalcin (2010)</b>      | Amenorrhea             | 'I do not have a period'                                                          | 11 (22%) | 7 (14%)  |
|                               | Irregular Menses       | NR                                                                                | 15 (30%) | 13 (26%) |
| <b>Yu (2013)</b>              | Amenorrhea             | >6 months without period                                                          | 18 (43%) | 7 (17%)  |
|                               | Oligomenorrhea         | Cycle lasting >32 days                                                            | 10 (24%) | 5 (12%)  |
|                               | Polymenorrhea          | Cycle lasting <28 days                                                            | 5 (12%)  | 6 (14%)  |
| <b>Chakhtoura (2015)</b>      | Amenorrhea             | No menstrual period for 6 months                                                  | 56 (43%) | 24 (24%) |
|                               | Oligomenorrhea         | >35 days                                                                          | 33 (26%) | 20 (20%) |
| <b>Lin (2016)<sup>b</sup></b> | Amenorrhea             | Absence of menses for > 6months                                                   | NR       | 11 (61%) |
|                               | Oligomenorrhea         | Cycle >35 days                                                                    | NR       | 0 (0%)   |
|                               | Polymenorrhea          | Cycle <22 days                                                                    | NR       | 7 (39%)  |
| <b>Sikora-Grabka (2018)</b>   | Irregular Menses       | NR                                                                                | 5 (50%)  | 2 (20%)  |
| <b>Dines (2021)</b>           | Amenorrhea             | 'Did your period stop before transplant? Did your period start after transplant?' | 63 (35%) | 15 (8%)  |

**Notes:** KRT: kidney replacement therapy; NR: not reported; % of pre-menopausal sample size pre- and post-transplantation. <sup>b</sup>Not included in meta-analysis since no reporting of pre-transplantation disturbances.

Supplemental Table 4: Study Quality Assessment.

| Author (Year)    | Study Quality Questions for Observational Studies |     |     |     |    |     |     |     |     |     |     |     | Study Quality Questions for Case-Control Studies Only |    |    |    | Overall Assessment |
|------------------|---------------------------------------------------|-----|-----|-----|----|-----|-----|-----|-----|-----|-----|-----|-------------------------------------------------------|----|----|----|--------------------|
|                  | Q1                                                | Q2  | Q3  | Q4  | Q5 | Q6  | Q7  | Q8  | Q11 | Q12 | Q13 | Q14 | Q4                                                    | Q6 | Q7 | Q8 |                    |
| Ølgaard (1975)   | yes                                               | yes | CD  | CD  | no | yes | yes | yes | yes | NR  | NA  | no  | -                                                     | -  | -  | -  | fair               |
| Bierman (1977)   | yes                                               | yes | yes | yes | no | yes | yes | yes | no  | NR  | yes | no  | -                                                     | -  | -  | -  | fair               |
| Morley (1979)    | yes                                               | yes | yes | CD  | no | yes | yes | yes | no  | NR  | yes | no  | -                                                     | -  | -  | -  | fair               |
| Lim (1980)       | yes                                               | yes | yes | CD  | no | yes | yes | yes | yes | NR  | NA  | no  | -                                                     | -  | -  | -  | fair               |
| Gómez (1980)     | no                                                | no  | yes | yes | no | yes | yes | yes | no  | NR  | NA  | no  | -                                                     | -  | -  | -  | fair               |
| Weizman (1983)   | yes                                               | yes | CD  | no  | no | yes | yes | yes | no  | NR  | NA  | no  | -                                                     | -  | -  | -  | fair               |
| El-Sheikh (1987) | no                                                | no  | yes | yes | no | yes | yes | yes | no  | NR  | yes | no  | -                                                     | -  | -  | -  | fair               |
| Schover (1990)   | yes                                               | yes | no  | yes | no | yes | yes | yes | no  | NR  | NA  | no  | -                                                     | -  | -  | -  | fair               |
| Bianchi (1992)   | no                                                | yes | yes | CD  | no | yes | yes | yes | yes | NR  | NA  | no  | -                                                     | -  | -  | -  | fair               |
| Otieno (1993)    | yes                                               | yes | yes | yes | no | yes | yes | yes | no  | NR  | yes | no  | -                                                     | -  | -  | -  | fair               |
| Milde (1996)     | yes                                               | yes | no  | yes | no | yes | yes | yes | no  | NR  | NA  | no  | -                                                     | -  | -  | -  | fair               |
| Cochrane (1997)  | yes                                               | yes | yes | yes | no | yes | yes | yes | yes | NR  | yes | no  | -                                                     | -  | -  | -  | good               |
| Holley (1997)    | yes                                               | yes | yes | yes | no | yes | yes | yes | yes | NR  | no  | yes | -                                                     | -  | -  | -  | good               |

|                               |     |     |     |     |    |     |     |     |     |     |     |     |    |     |    |     |      |
|-------------------------------|-----|-----|-----|-----|----|-----|-----|-----|-----|-----|-----|-----|----|-----|----|-----|------|
| Kim (1998)                    | yes | yes | yes | NR  | no | yes | yes | yes | no  | NR  | yes | yes | -  | -   | -  | -   | fair |
| Kawashima (1998)              | yes | yes | CD  | CD  | no | yes | yes | yes | yes | NR  | yes | no  | -  | -   | -  | -   | fair |
| Rush (2000)                   | yes | yes | yes | yes | no | yes | yes | yes | yes | NR  | yes | no  | -  | -   | -  | -   | good |
| Weisinger (2000)              | yes | yes | no  | yes | no | yes | yes | yes | yes | NR  | NA  | no  | -  | -   | -  | -   | fair |
| Jang (2001)                   | yes | yes | yes | yes | no | yes | yes | yes | no  | NR  | NA  | no  | -  | -   | -  | -   | fair |
| Shanmugavadivoo (2003)        | yes | no  | yes | yes | no | yes | yes | yes | no  | NR  | yes | no  | -  | -   | -  | -   | fair |
| Kramer (Sept. 2003)           | yes | yes | CD  | yes | no | yes | yes | yes | no  | NR  | NA  | no  | -  | -   | -  | -   | fair |
| Matuszkiewicz-Rowińska (2004) | yes | yes | yes | yes | no | yes | yes | yes | yes | NR  | NA  | no  | -  | -   | -  | -   | fair |
| Kramer (March 2003)           | yes | yes | yes | yes | no | yes | yes | yes | yes | NR  | yes | no  | -  | -   | -  | -   | good |
| Di Iorio (2004)               | yes | yes | yes | yes | no | yes | yes | yes | no  | NR  | NA  | no  | -  | -   | -  | -   | fair |
| Yücel (2004)                  | yes | yes | yes | yes | no | yes | yes | yes | yes | NR  | yes | no  | -  | -   | -  | -   | good |
| Pezeshki (2004)               | yes | yes | CD  | yes | no | yes | yes | yes | no  | NR  | yes | no  | CD | yes | NA | yes | fair |
| Guazzelli (2008)              | yes | yes | yes | yes | no | yes | yes | yes | yes | NR  | yes | no  | -  | -   | -  | -   | good |
| Song (2008)                   | yes | yes | yes | no  | no | yes | yes | yes | no  | NR  | yes | no  | CD | yes | NA | CD  | fair |
| Filocamo (2009)               | yes | yes | yes | yes | no | yes | yes | yes | yes | yes | no  | no  | -  | -   | -  | -   | good |
| Karayalcin (2010)             | yes | yes | CD  | yes | no | yes | yes | yes | yes | NR  | yes | no  | -  | -   | -  | -   | fair |
| Arikan (2011)                 | yes | yes | yes | yes | no | yes | yes | yes | yes | NR  | yes | no  | -  | -   | -  | -   | good |
| Koca (2012)                   | yes | yes | yes | CD  | no | yes | yes | yes | yes | NR  | yes | no  | -  | -   | -  | -   | fair |

|                         |     |     |     |     |    |     |     |     |     |    |     |     |   |   |   |   |      |
|-------------------------|-----|-----|-----|-----|----|-----|-----|-----|-----|----|-----|-----|---|---|---|---|------|
| van Eps (2012)          | yes | yes | CD  | yes | no | yes | yes | yes | no  | NR | yes | no  | - | - | - | - | fair |
| Yu (2013)               | yes | yes | yes | yes | no | yes | yes | yes | yes | NR | yes | no  | - | - | - | - | good |
| Al-Turki (2014)         | yes | yes | yes | yes | no | yes | yes | yes | no  | NR | NA  | no  | - | - | - | - | fair |
| Chakhtoura (2015)       | yes | yes | yes | yes | no | yes | yes | yes | yes | NR | yes | no  | - | - | - | - | good |
| Cheung (2015)           | yes | yes | yes | yes | no | yes | yes | yes | yes | NR | yes | no  | - | - | - | - | good |
| Teuwafeu (2016)         | yes | yes | yes | yes | no | yes | yes | yes | yes | NR | NA  | no  | - | - | - | - | fair |
| Sikora-Grabka (2016)    | yes | yes | yes | yes | no | yes | yes | yes | no  | NR | yes | no  | - | - | - | - | fair |
| Lin (2016)              | yes | yes | yes | yes | no | yes | yes | yes | yes | NR | NA  | no  | - | - | - | - | fair |
| Coelho Gonçalves (2019) | yes | no  | yes | yes | no | yes | yes | yes | no  | NR | NA  | no  | - | - | - | - | fair |
| Yaprak (2019)           | yes | yes | yes | yes | no | yes | yes | yes | no  | NR | yes | no  | - | - | - | - | fair |
| Fayed (2019)            | yes | yes | CD  | yes | no | yes | yes | yes | no  | NR | yes | no  | - | - | - | - | fair |
| Ramesh (2020)           | yes | yes | yes | yes | no | yes | yes | yes | yes | NR | yes | yes | - | - | - | - | good |
| Serret-Montaya (2020)   | yes | yes | yes | yes | no | yes | yes | yes | yes | NR | yes | no  | - | - | - | - | good |
| Kim (2020)              | yes | yes | yes | yes | no | yes | yes | yes | yes | NR | yes | yes | - | - | - | - | good |
| Dines (2021)            | yes | yes | no  | yes | no | yes | yes | no  | no  | NR | NA  | yes | - | - | - | - | fair |

Notes: CD: cannot determine; NR: not reported; NA: Not applicable.

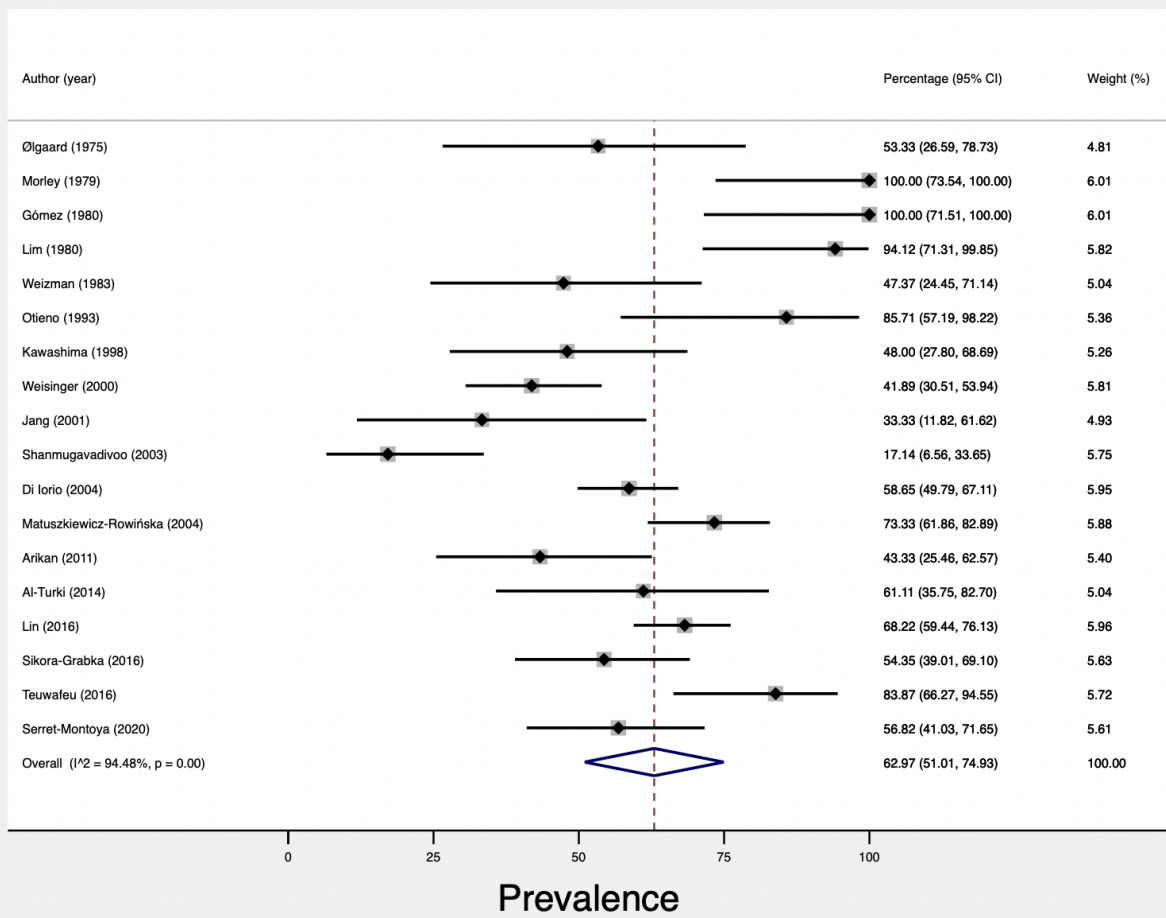

Supplemental Figure 1. Prevalence of menstrual disturbances in dialyzed females.

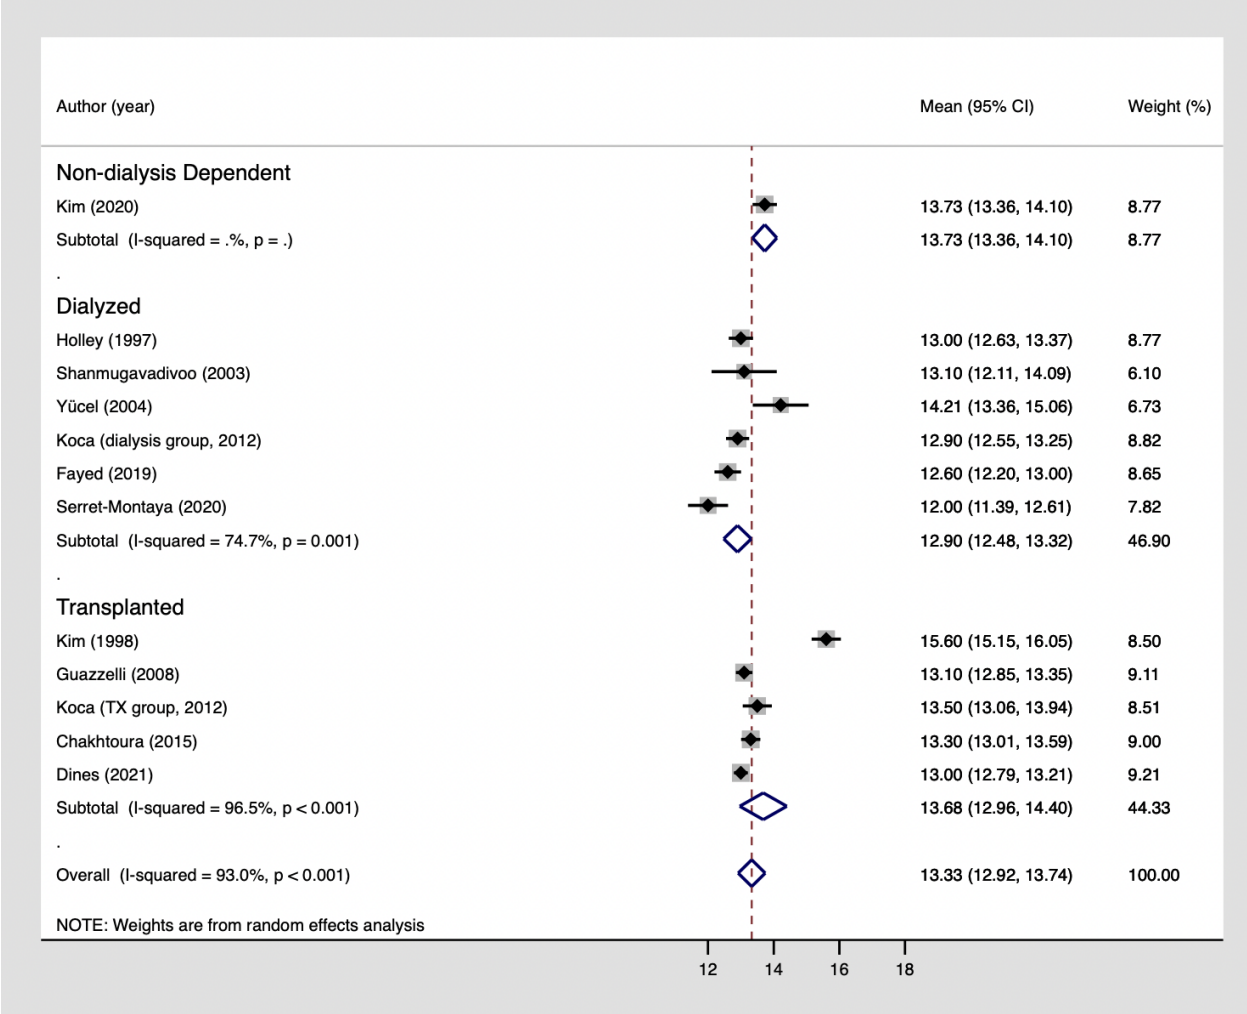

Supplemental Figure 2. Pooled age of menarche, stratified by kidney replacement therapy type, in females with chronic kidney disease.

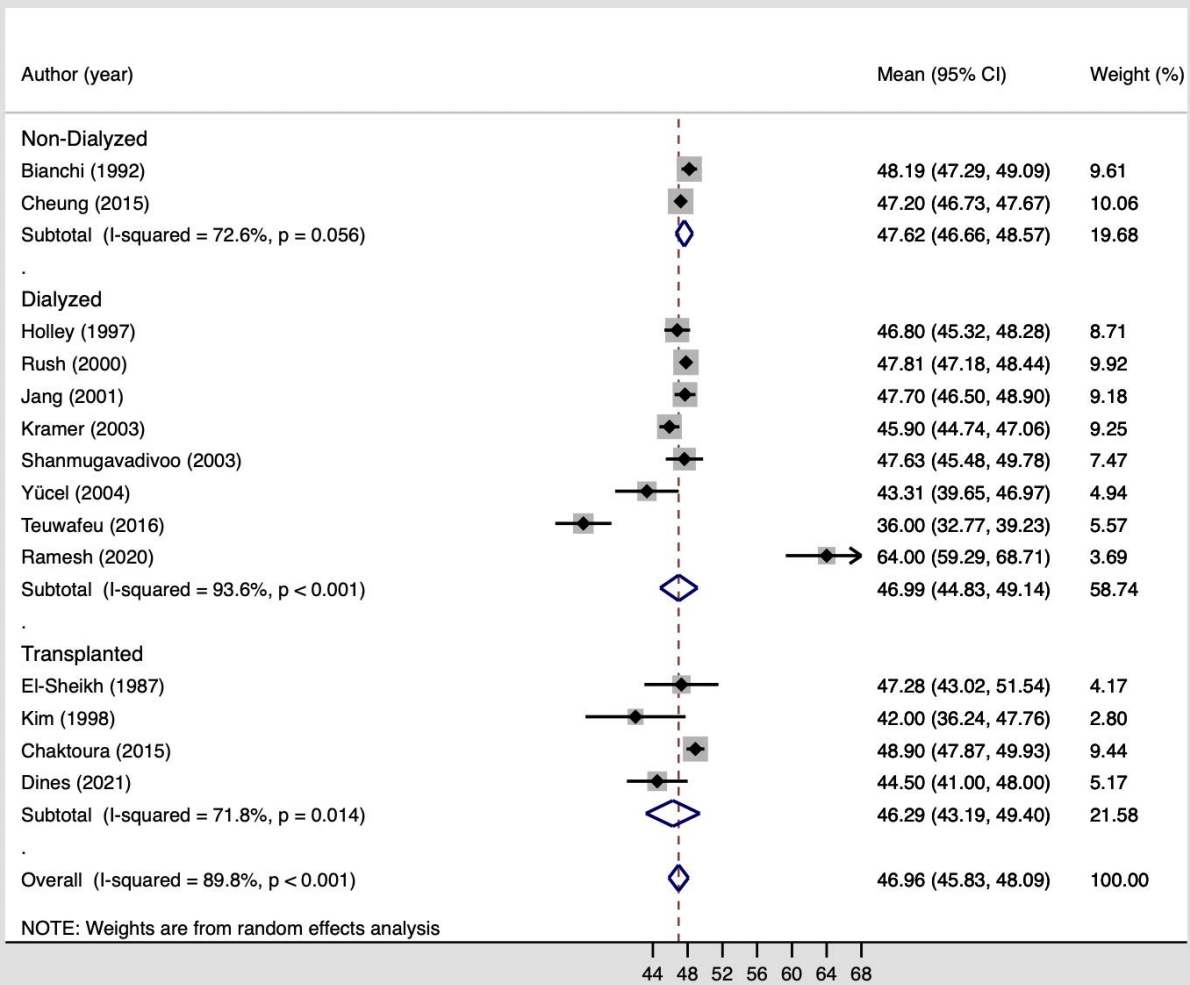

Supplemental Figure 3. Pooled age of menopause, stratified by kidney replacement therapy type, in females with chronic kidney disease.

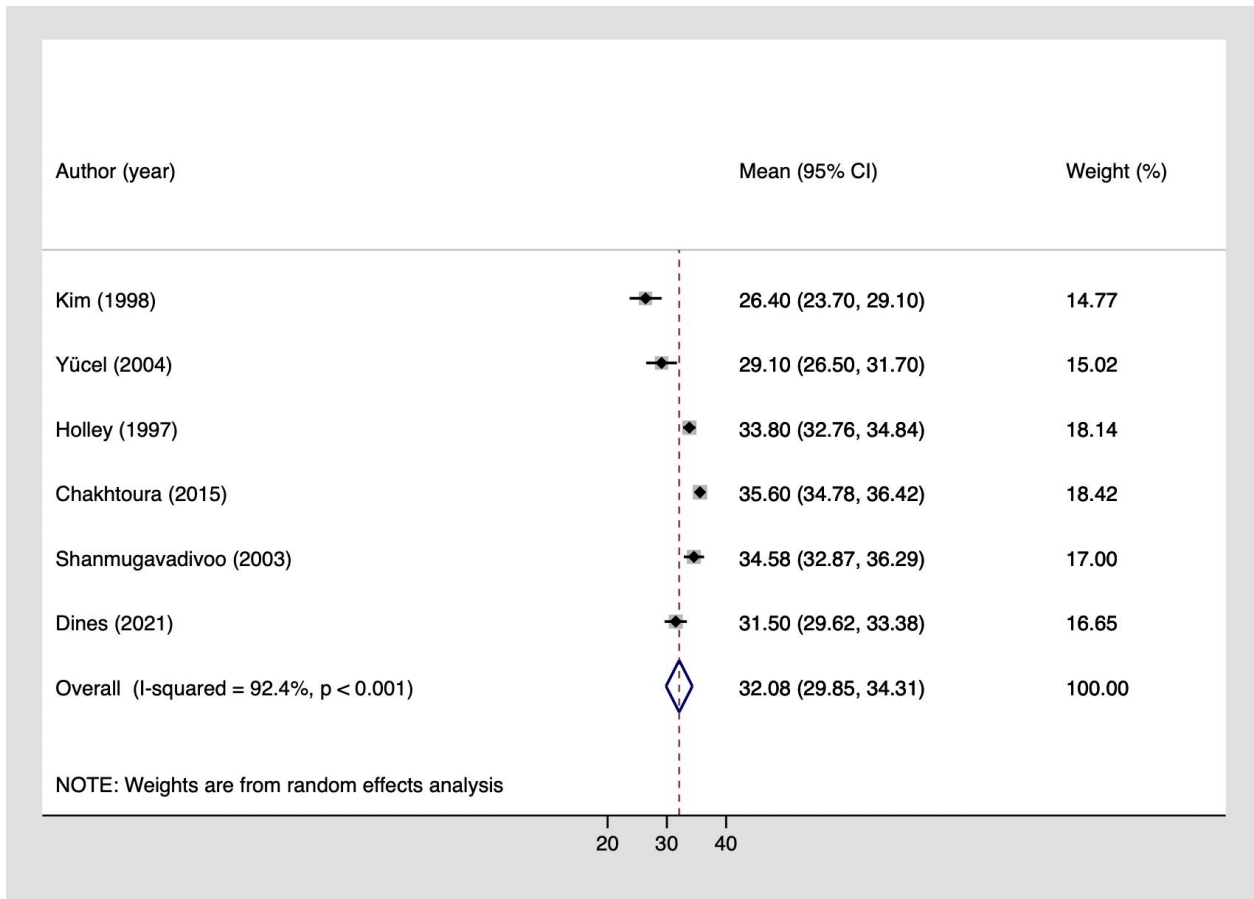

Supplemental Figure 4. Pooled reproductive lifespan in females with chronic kidney disease.



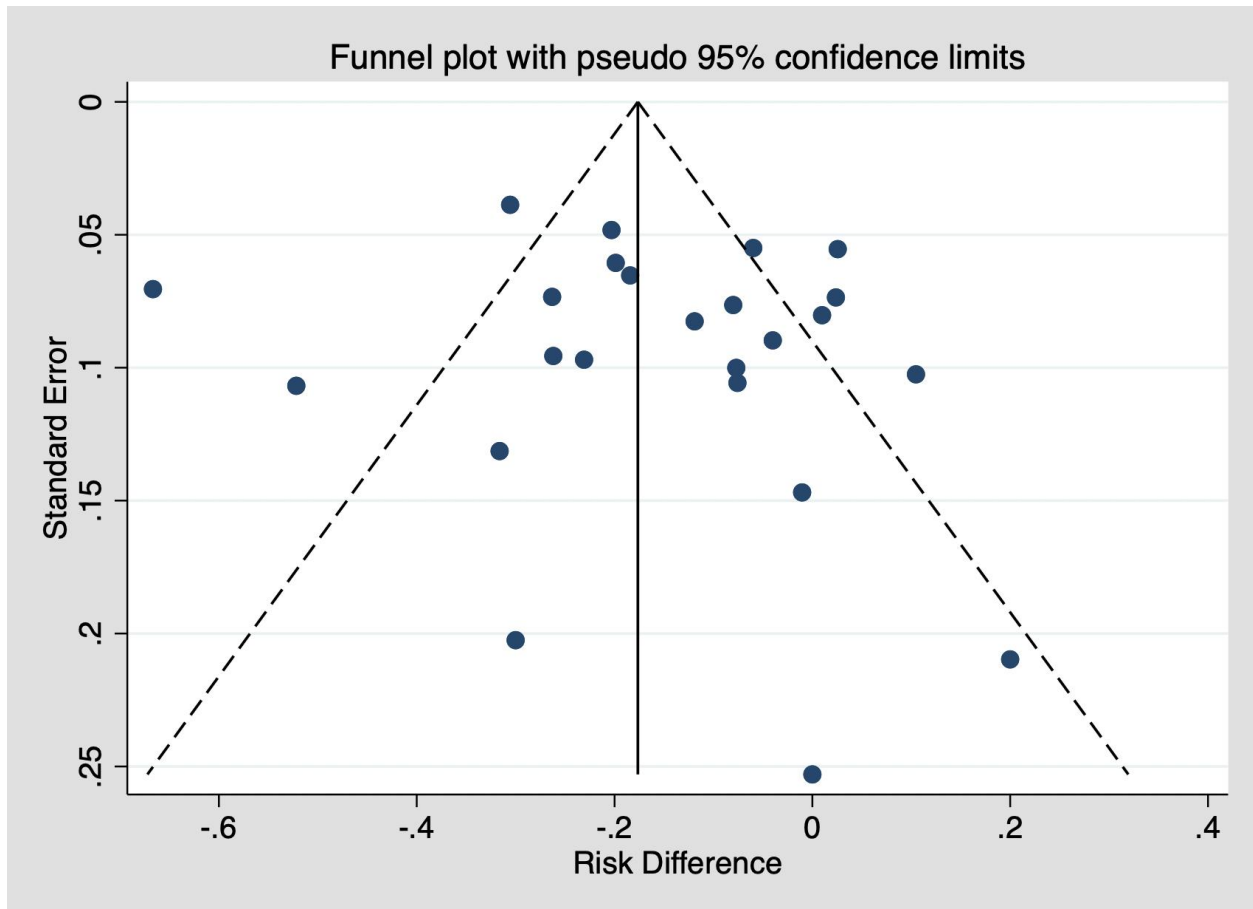

Supplemental Figure 5. Funnel plot for assessment of publication bias of pooled risk difference of menstrual disturbance in females with chronic kidney disease pre- and post- kidney transplantation.
